# Supplementary material
Source: PubMed Central journal article supplement (PMC2533842)
Supplement: NIHMS63575-supplement-1File002.pdf [file NIHMS63575-supplement-1File002.pdf]

# Supporting Information

## Geosmin Biosynthesis. Mechanism of the Fragmentation-Rearrangement in the Conversion of Germacradienol to Geosmin

*Jiaoyang Jiang and David E. Cane\**

Department of Chemistry, Box H, Brown University, Providence, Rhode Island 02912-9108

E-mail: David\_Cane@brown.edu

**Materials and Methods.** General materials and methods were as previously described.<sup>1,2</sup> Recombinant germacradienol/geosmin synthase (GS), encoded by the *sco6073* (SC9B1.20) gene of *S. coelicolor* A3(2) was expressed from *E. coli* BL21(DE3)pLysS/pRW31, resolubilized from inclusion bodies, purified to homogeneity, and assayed as previously described.<sup>1,2</sup>

**Derivatization of Acetone – Optimization of pH.** Acetone (10  $\mu$ L, 27 mM) and 0.1545 g cysteamine hydrochloride (270 mM) were added to 5 mL reaction buffer (50 mM Tris-HCl, 1 mM EDTA, 20% glycerol, 5 mM MgCl<sub>2</sub>, pH 8.2) in a 20-mL glass vial, and the pH of the solution was immediately adjusted to 8.0 with 0.1 N NaOH. The mixture was stirred at room temperature overnight. Parallel experiments were conducted at pH 5.0, 6.0, and 7.0. The reaction mixture was transferred to a test tube, 1  $\mu$ L of  $\alpha$ -humulene stock solution was added as internal standard, and the mixture was extracted with 3 $\times$ 3 mL CH<sub>2</sub>Cl<sub>2</sub>. The combined organic layers were dried by passage through a Pasteur pipette containing 1 g of MgSO<sub>4</sub> before concentration under reduced pressure at 0  $^{\circ}$ C to 200  $\mu$ L. A 1- $\mu$ L portion of the concentrated extract was analyzed by GC–MS (30 m  $\times$  0.25 mm DB5 capillary column, using a temperature program of 50–280  $^{\circ}$ C, 20  $^{\circ}$ C min<sup>-1</sup>) (Figures S1 and S2).

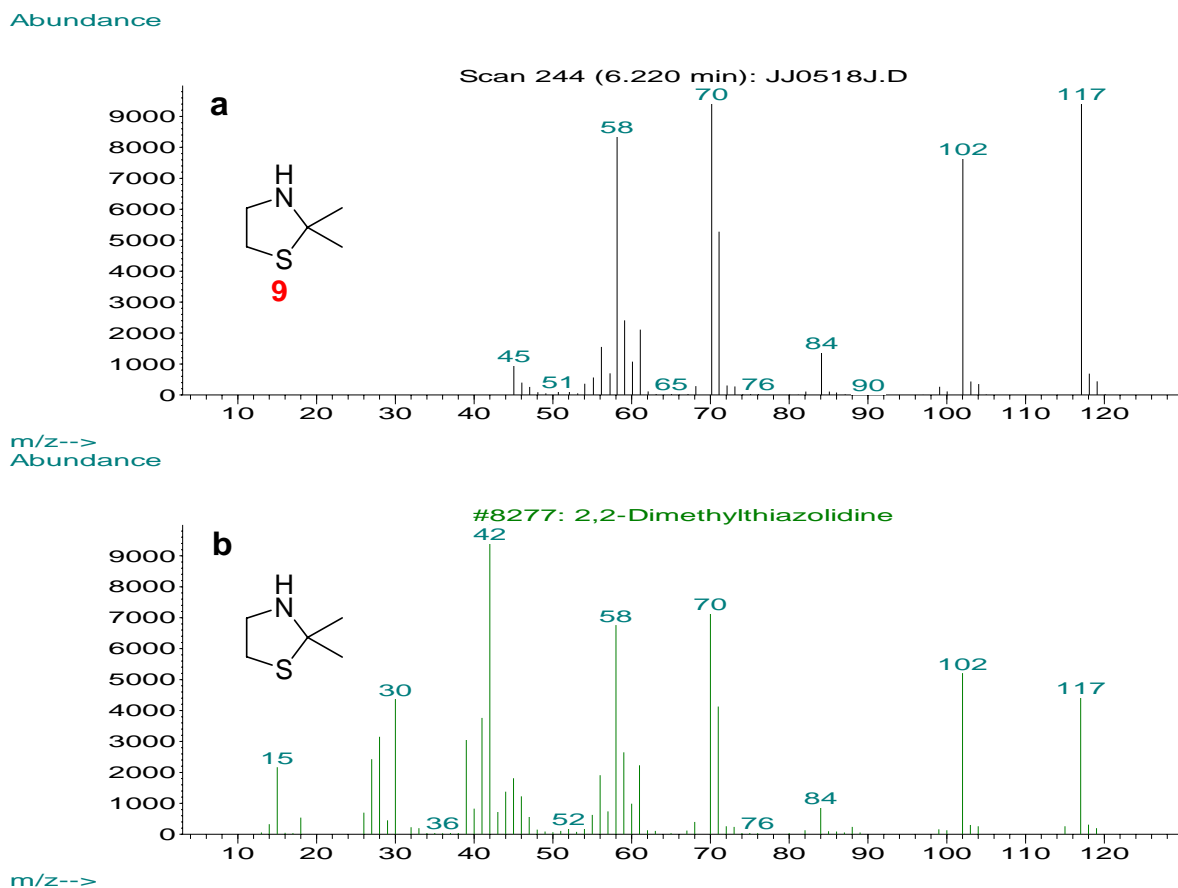

**Figure S1.** a) MS of 2,2-dimethylthiazolidine (**9**) derived from acetone. b) MS of standard 2,2-dimethylthiazolidine in the NIST/EPA/NIH Mass Spectral Library (2002 version).

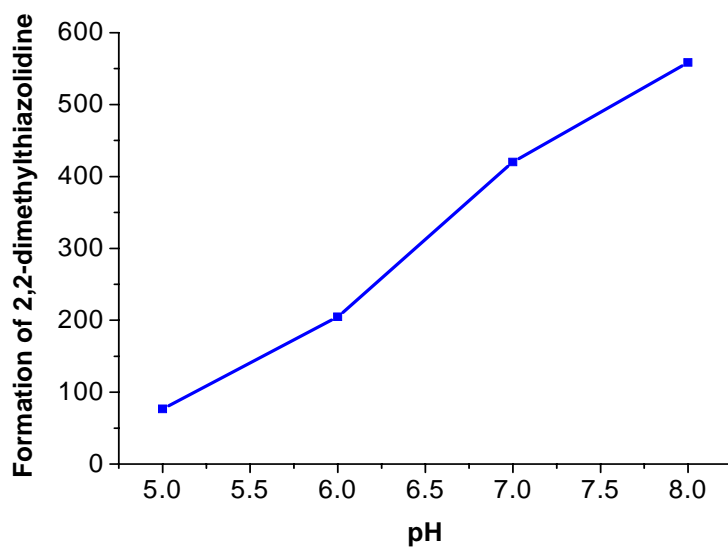

**Figure S2.** Relative yield of 2,2-dimethylthiazolidine (**9**) as a function of pH (internal standard  $\alpha$ -humulene = 1.0).

### Formation of Acetone in the Incubation of FPP with Germacradienol/Geosmin Synthase.

FPP (66  $\mu\text{M}$ ) was incubated with germacradienol/geosmin synthase (10.2  $\mu\text{M}$ ) in 7.5 mL of buffer (50 mM Tris-HCl, 20% glycerol, 2 mM  $\text{MgCl}_2$ , pH 8.2) at 30  $^\circ\text{C}$  for 7 h 20 min, without a pentane overlay in order to avoid transfer of acetone out of the aqueous solution. At the end of the incubation period, 0.01 g cysteamine hydrochloride (11.7 mM) was added, and the pH was immediately adjusted to 8.0. The reaction mixture was stirred at room temperature overnight, and then extracted with 3 $\times$ 3 mL of  $\text{CH}_2\text{Cl}_2$ . The combined organic layers were dried over  $\text{MgSO}_4$  before being concentrated under reduced pressure at 0  $^\circ\text{C}$  to 200  $\mu\text{L}$  and analyzed by GC-MS (Figure S3). A control incubation was carried out with 66  $\mu\text{M}$  FPP and 10.2  $\mu\text{M}$  boiled (98  $^\circ\text{C}$ , 30 min) protein.

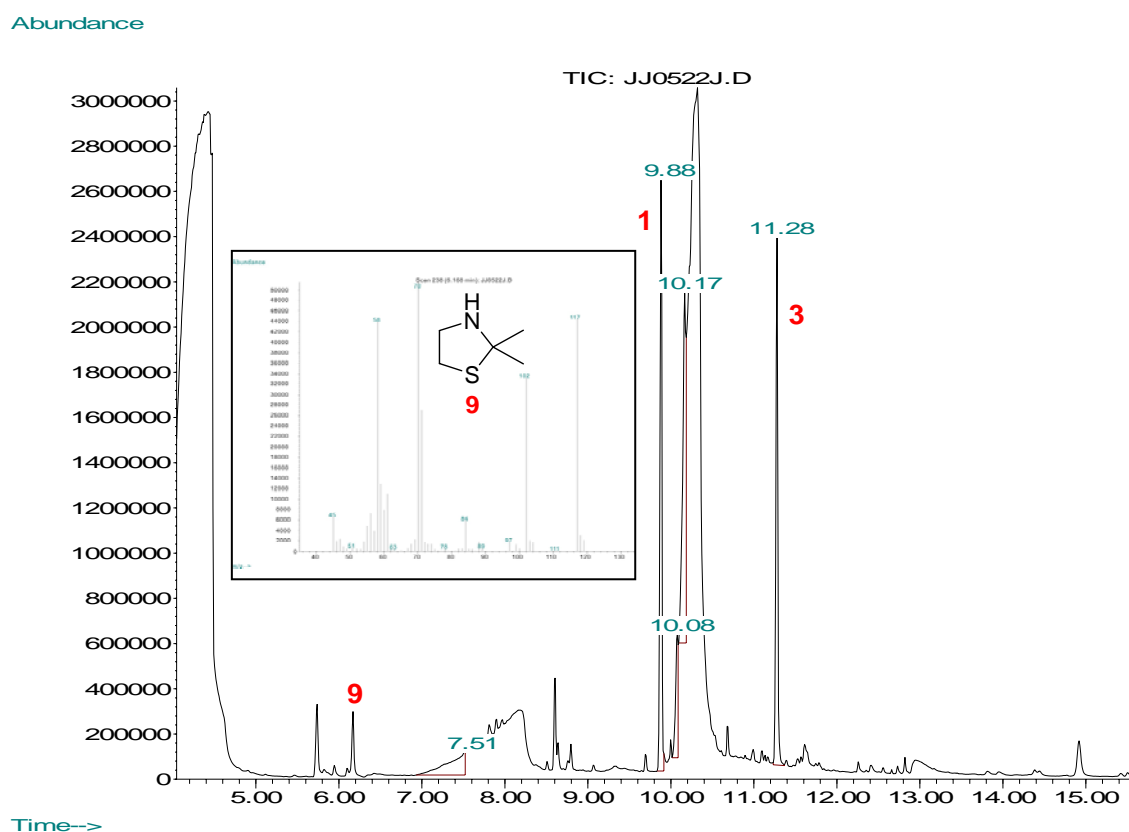

**Figure S3.** Trapping of acetone generated by the incubation of FPP with germacradienol/geosmin synthase. GC-MS of organic extract after treatment with cysteamine. Inset: EI-MS of 2,2-dimethylthiazolidine (**9**), ret. time 6.17 min.

### Incubation of $[13,13,13\text{-}^2\text{H}_3]\text{FPP}$ with Germacradienol/Geosmin Synthase.

$[13,13,13\text{-}^2\text{H}_3]\text{FPP}$  (**2a**, 103  $\mu\text{M}$ ) was incubated with germacradienol/geosmin synthase (5.1  $\mu\text{M}$ ) in 5 mL of buffer (50 mM Tris-HCl, 20% glycerol, 3 mM  $\text{MgCl}_2$ , pH 8.2) at 30  $^\circ\text{C}$  for 6 h 15 min, with

a pentane overlay. The reaction mixture was extracted with 3×3 mL of pentane/CH<sub>2</sub>Cl<sub>2</sub> (5:1) and analyzed by GC-MS (Figure S4).

To detect the formation of deuterated acetone **8a**, the acetone was converted into corresponding dimethylthiazolidine **9a**. FPP (**2a**, 62 μM) was incubated with germacradienol/geosmin synthase (7.8 μM) and in 8.3 mL of buffer was incubated at 30 °C for 7 h 35 min, without a pentane overlay. After the incubation, 100 mM cysteamine hydrochloride was added, and the pH was immediately adjusted to 8.0. The reaction mixture was stirred at room temperature overnight, extracted with 3×3 mL of CH<sub>2</sub>Cl<sub>2</sub>, and analyzed by GC-MS (Figure S5).

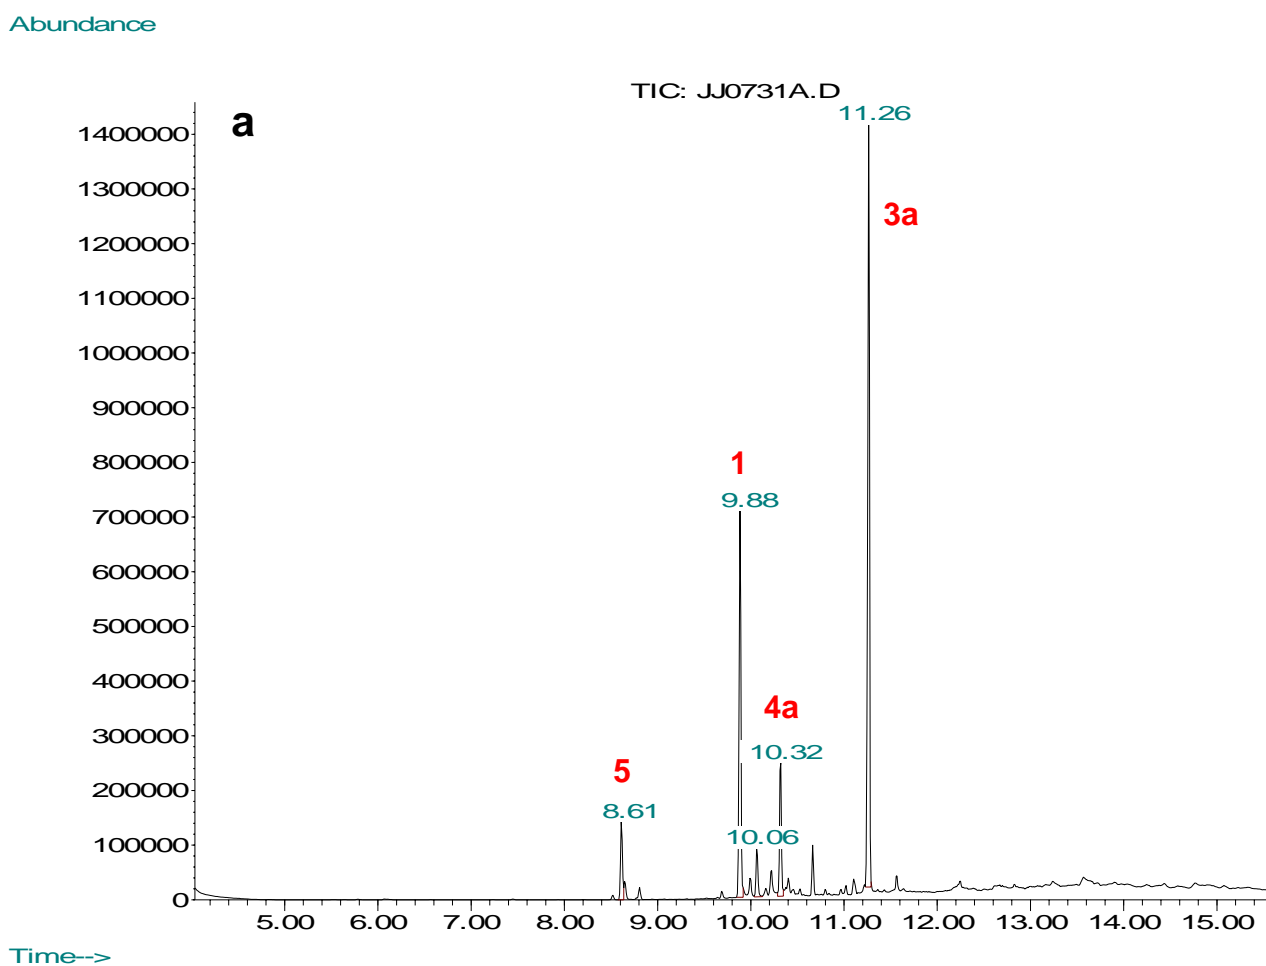

Abundance

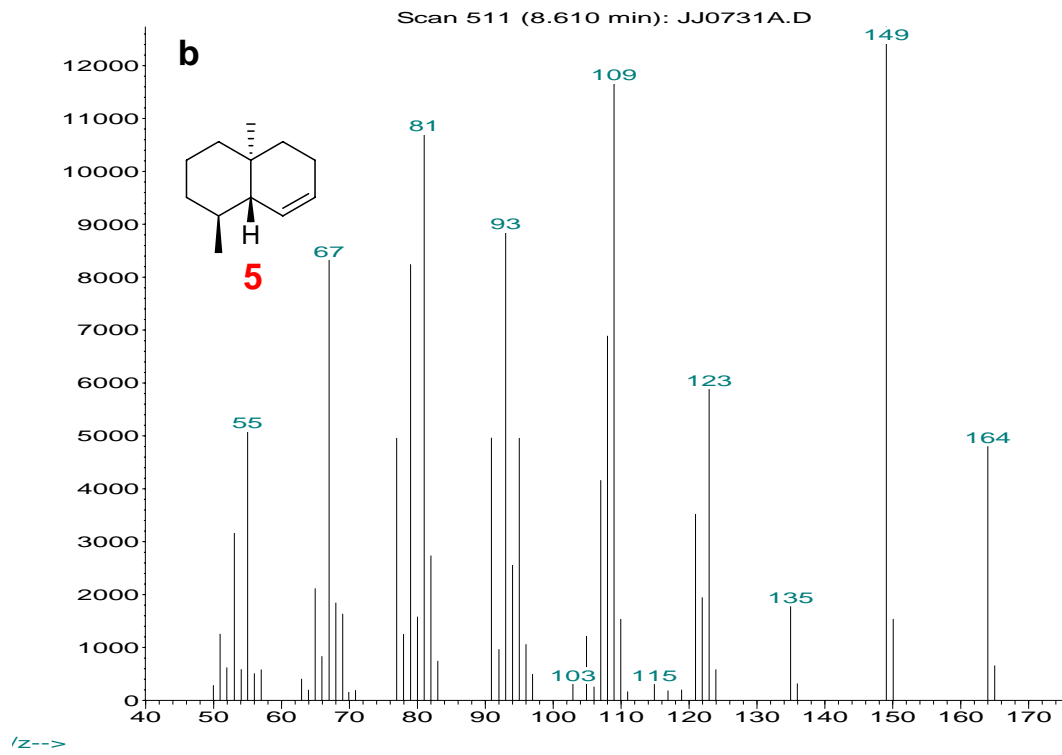

Abundance

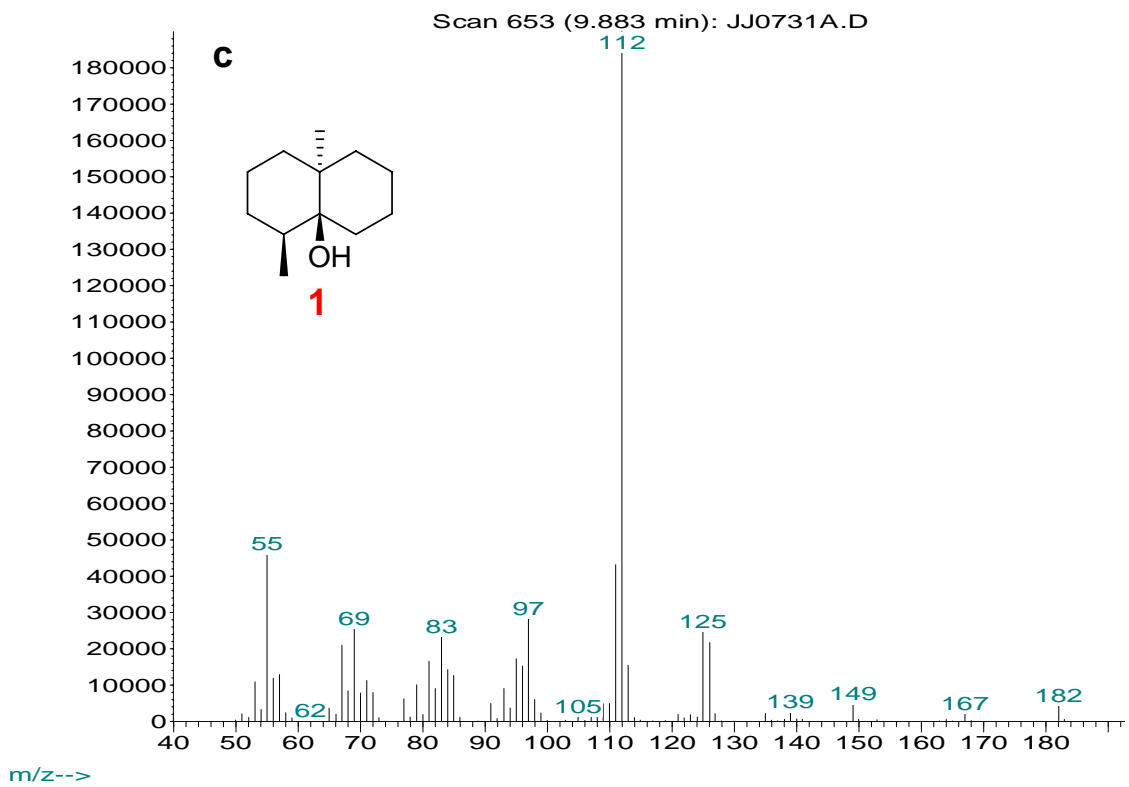

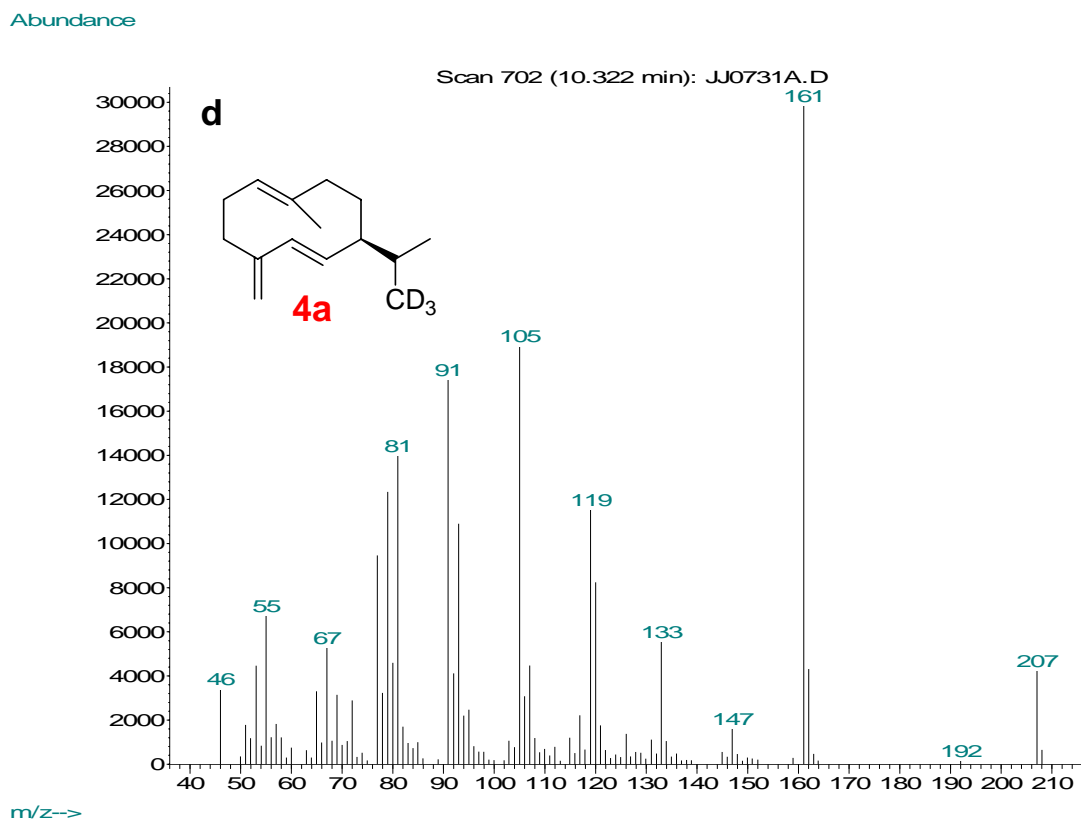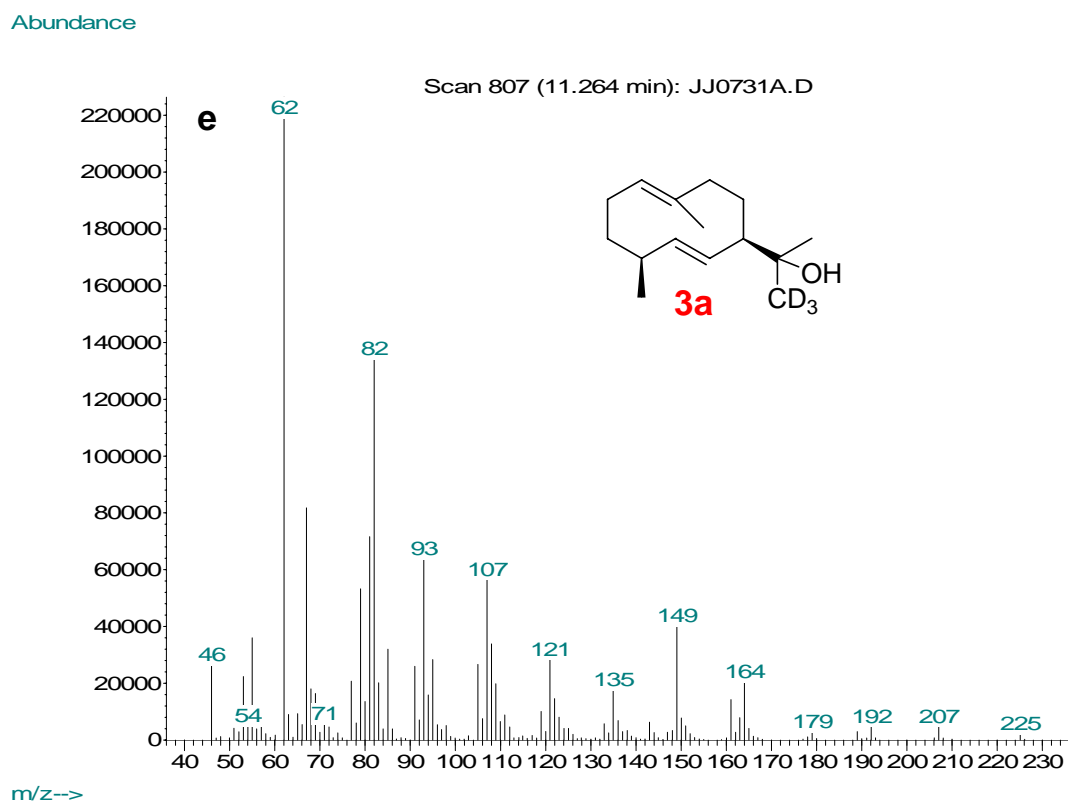

**Figure S4.** Incubation of 103  $\mu\text{M}$  [13,13,13-<sup>2</sup>H<sub>3</sub>]FPP (**2a**) with 5.1  $\mu\text{M}$  germacradienol/geosmin synthase with at 30 °C for 6 h 15 min. a) GC-MS. b) MS of octalin (**5**), ret. time 8.61 min. c) MS

of geosmin (**1**), ret. time 9.88 min. d) MS of germacrene D (**4a**), ret. time 10.32 min. e) MS of germacradienol (**3a**), ret. time 11.26 min.

Abundance

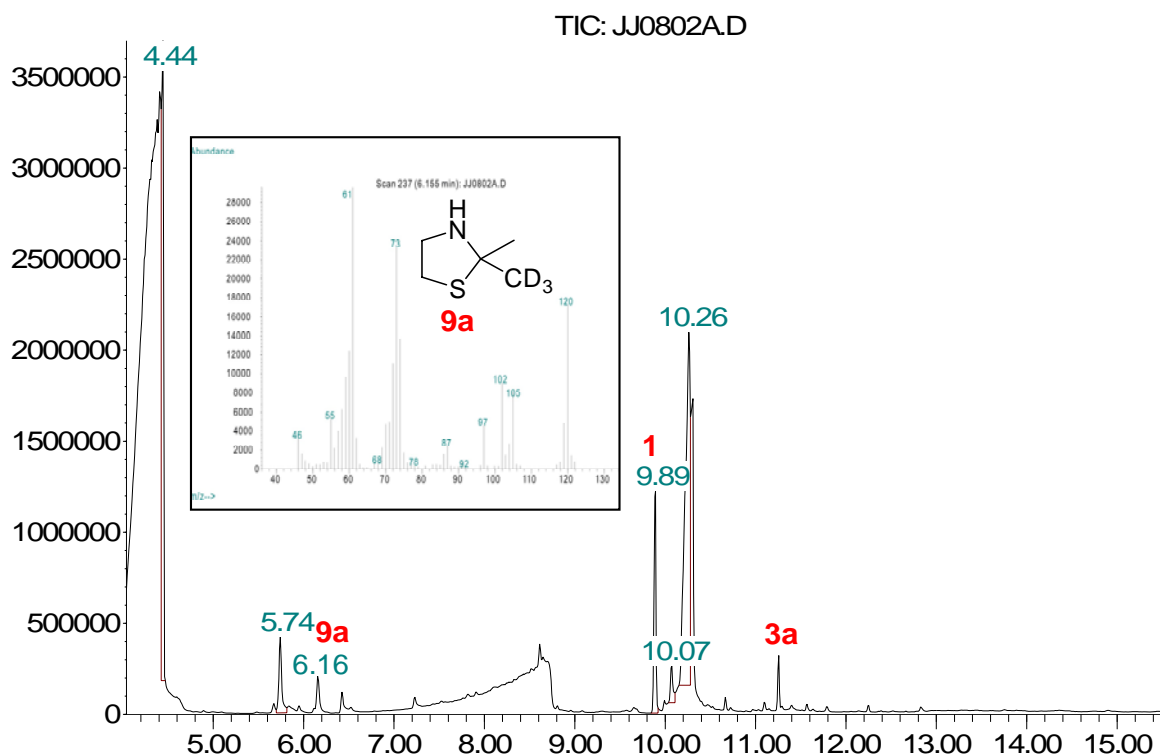

Time-->

**Figure S5.** Trapping of acetone generated by the incubation of  $[13,13,13\text{-}^2\text{H}_3]\text{FPP}$  with germacradienol/geosmin synthase. GC-MS of organic extract after treatment with cysteamine. Inset: EI-MS of  $[^2\text{H}_3\text{-Me}]\text{-2,2-dimethylthiazolidine}$  (**9a**), ret. time 6.16 min.

**Scheme S1.** Synthesis of  $[2\text{-}^2\text{H}]\text{FPP}$  (**2b**)

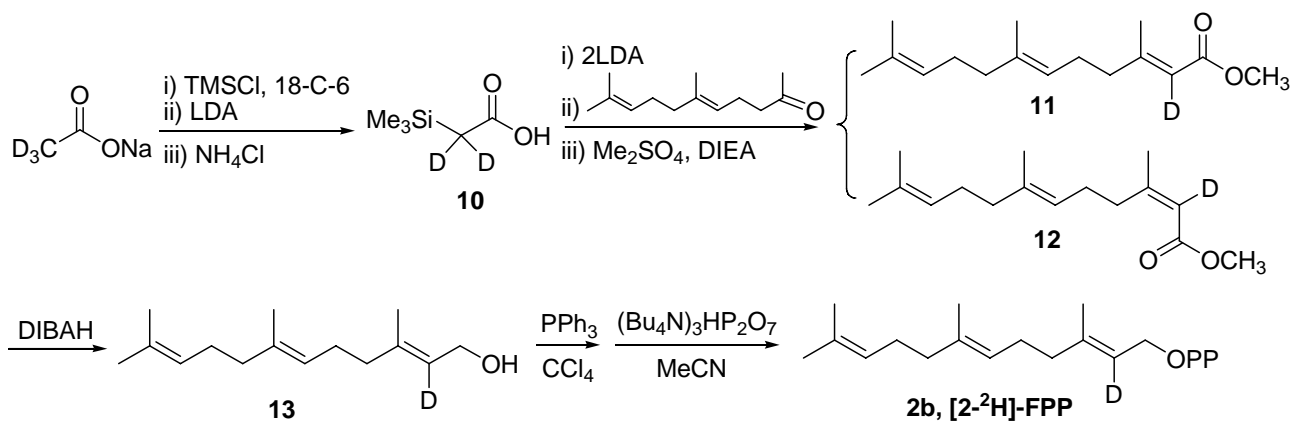

## Synthesis of [2-<sup>2</sup>H]-FPP (2b)

[2-<sup>2</sup>H<sub>2</sub>]Trimethylsilylacetic acid (**10**). A mixture of 1.14 g (13.4 mmol) of vacuum-dried sodium [2-<sup>2</sup>H<sub>3</sub>]acetate (99 atom % <sup>2</sup>H, Aldrich), 1.46 g (13.4 mmol) of trimethylsilyl chloride, and 18-crown-6 ether (1.24 g, 4.7 mmol) in 80 mL of Et<sub>2</sub>O was refluxed for 2.5 h under N<sub>2</sub>. The reaction mixture was cooled and the solution transferred dropwise to another flask containing 14.7 mmol of lithium diisopropylamide (prepared by reaction of *n*-butyllithium with diisopropylamine) in Et<sub>2</sub>O at -78 °C. The resulting white suspension was stirred for 30 min at -78 °C, then warmed to room temperature for an additional 30 min during which the precipitate dissolved. The yellow solution was refluxed for 2 h after which the reaction was quenched by addition of satd aq. NH<sub>4</sub>Cl. The pH of the aq. phase was adjusted to 3, brine was added, and the solution was extracted with Et<sub>2</sub>O (3 x 100 mL). Drying of the Et<sub>2</sub>O extract (MgSO<sub>4</sub>) and concentration under vacuum gave 856 mg (40%) of [2-<sup>2</sup>H<sub>3</sub>]trimethylsilylacetic acid which solidified at -20 °C. <sup>1</sup>H NMR (300 MHz, CDCl<sub>3</sub>) and <sup>13</sup>C NMR (75 MHz, CDCl<sub>3</sub>) are both consistent with the reported data.<sup>3</sup>

(*E*)- and (*Z*)-Methyl [2-<sup>2</sup>H]farnesoates (**11**) and (**12**). [2-<sup>2</sup>H<sub>2</sub>]Trimethylsilylacetic acid (**10**, 1.38 g, 10.3 mmol) in 10 mL of THF was added dropwise to 1.9 eq. of lithium diisopropylamide in THF at -78 °C. The reaction mixture was stirred for 30 min at -78 °C and 1 h at 0 °C, then cooled to -78 °C. A solution of 2.0 g (10.3 mmol, 1.0 eq.) of geranylacetone in 8 mL of THF was added dropwise and the resulting solution was stirred for 1 h at -78 °C, 1 h at -10 °C, and 1 h at room temperature. The reaction was quenched by dropwise addition of 0.1 N HCl at 0 °C. After the mixture was stirred for an additional 10 min, the THF was evaporated *in vacuo*, and the oily product was taken up in hexane and poured into a mixture of 65 mL 0.5 N HCl and 190 mL of hexane. After extraction with hexane (3 x 200 mL), drying (MgSO<sub>4</sub>), and concentration *in vacuo*, flash silica gel column chromatography (1-20% EtOAc:hexane, stepwise) gave 2.08 g of a mixture of *cis* and *trans* acids which was esterified without further purification. A mixture of the isomeric acids (1.80 g) was dissolved in 50 mL of MeCN at 0 °C, 938 mg (7.6 mmol) of diisopropylethylamine was added, and the solution was stirred for 20 min at 0 °C and 30 min at room temperature, then cooled to 0 °C. Dimethyl sulphate (1.92 g, 15.2 mmol) was added. After 30 min stirring at 0 °C, the mixture was warmed to room temperature and stirred for 3.5 h. After addition of 0.1 N aq. NH<sub>4</sub>OH to destroy



excess Me<sub>2</sub>SO<sub>4</sub>, the MeCN was evaporated and the product mixture was taken up in Et<sub>2</sub>O and partitioned into H<sub>2</sub>O. After extraction with Et<sub>2</sub>O, drying (MgSO<sub>4</sub>), and concentration *in vacuo*, the crude product was purified by prep. TLC (10% Et<sub>2</sub>O in hexane) to give 492 mg of a mixture of the methyl esters of *cis* and *trans* [2-<sup>2</sup>H]farnesoic acid (**11** and **12**). Spectroscopic data for the unlabeled methyl esters, generated by identical procedures, were identical in all respects with authentic samples.

[2-<sup>2</sup>H]Farnesol (**13**). To a solution of 492 mg (1.96 mmol) of the (*E*)- and (*Z*)- methyl [2-<sup>2</sup>H]farnesoate (**11** and **12**) in 37 mL of CH<sub>2</sub>Cl<sub>2</sub> at -78 °C was added dropwise 4.51 mL (4.51 mmol) of diisobutylaluminum hydride (1 M, hexane). After stirring for 30 min at -78 °C, the reaction mixture was warmed to 0 °C with stirring for another 30 min, and the reaction was then quenched by addition of 9 mL of 0.5 M aq. sodium potassium tartrate followed by vigorous stirring of the mixture for 4 h at room temperature. After addition of H<sub>2</sub>O, extraction with CH<sub>2</sub>Cl<sub>2</sub>, drying (MgSO<sub>4</sub>) and concentration, the crude product was purified by column chromatography on AgNO<sub>3</sub>-coated silica gel (20% EtOAc in hexane) to yield 88.6 mg (*E*)-[2-<sup>2</sup>H]farnesol (**13**) (Figure S6).

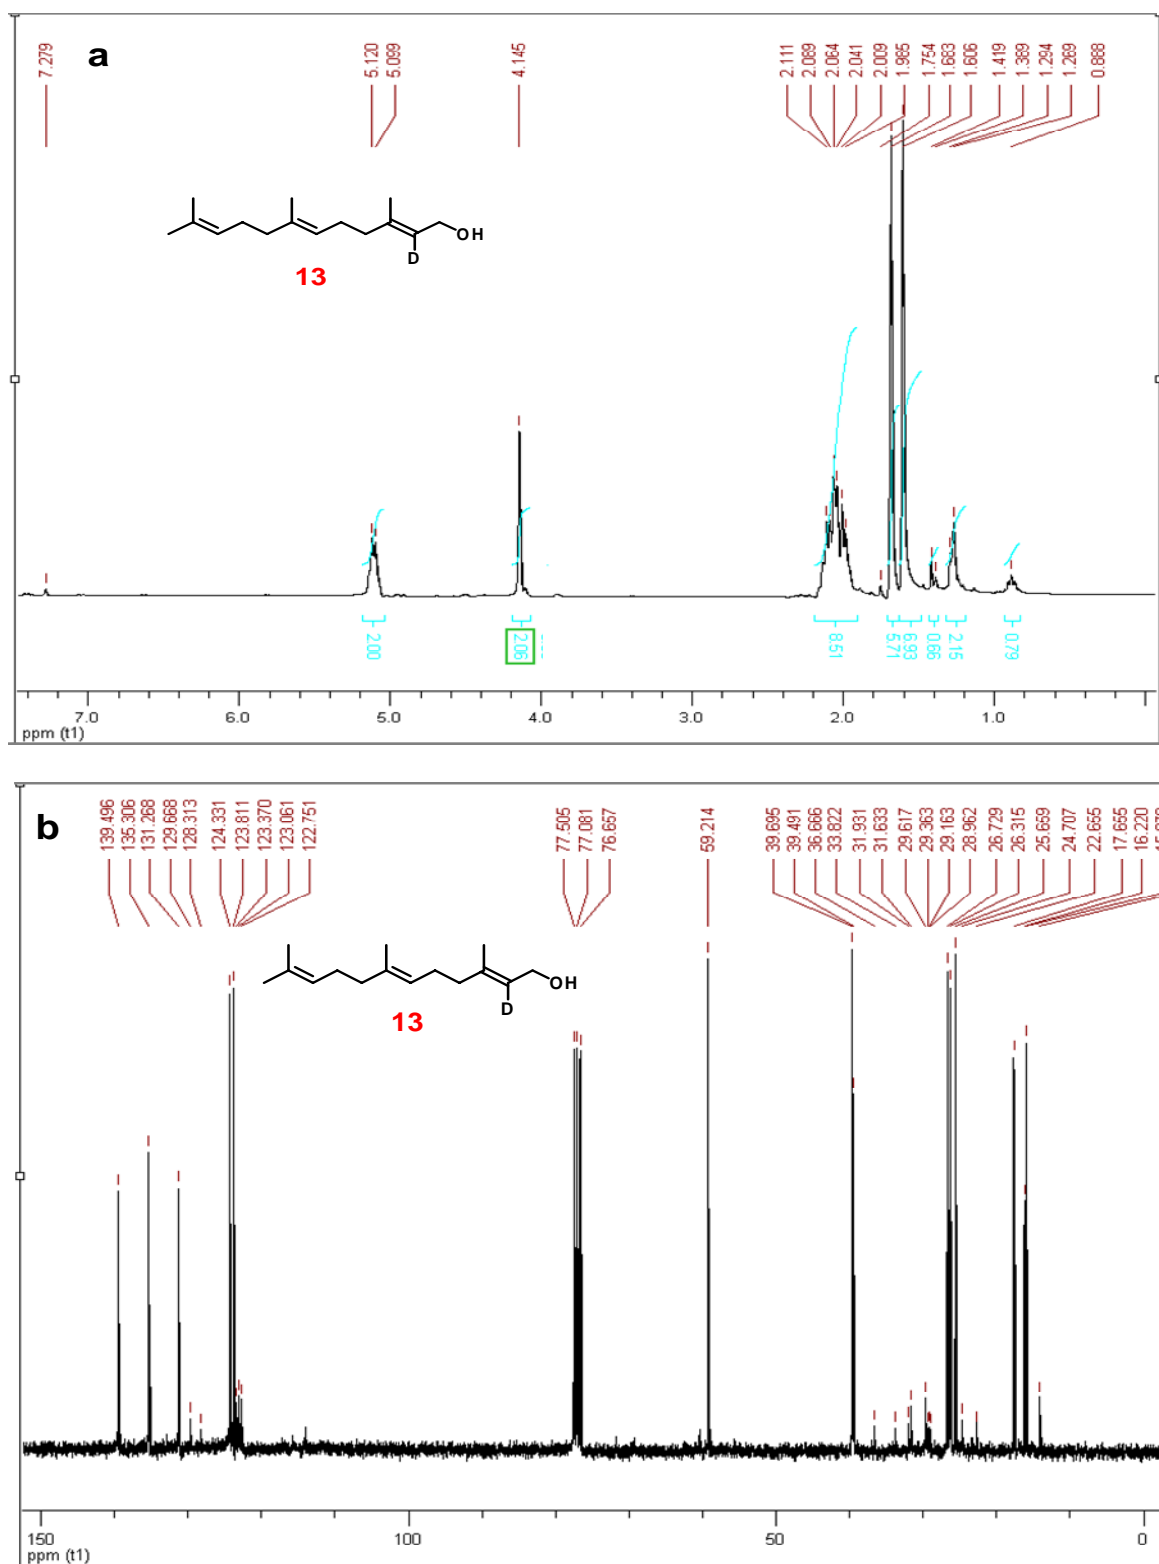

**Figure S6.** [2-<sup>2</sup>H]farnesol (**13**) a) <sup>1</sup>H NMR (300 MHz, CDCl<sub>3</sub>). b) <sup>13</sup>C NMR (75 MHz, CDCl<sub>3</sub>).

[2-<sup>2</sup>H]Farnesyl diphosphate (**2b**) [2-<sup>2</sup>H]Farnesyl diphosphate (**2b**, 160 mg) was prepared from [2-<sup>2</sup>H]farnesol (**13**) in ca 80% yield by the method previously described (Figure S7).<sup>4</sup>

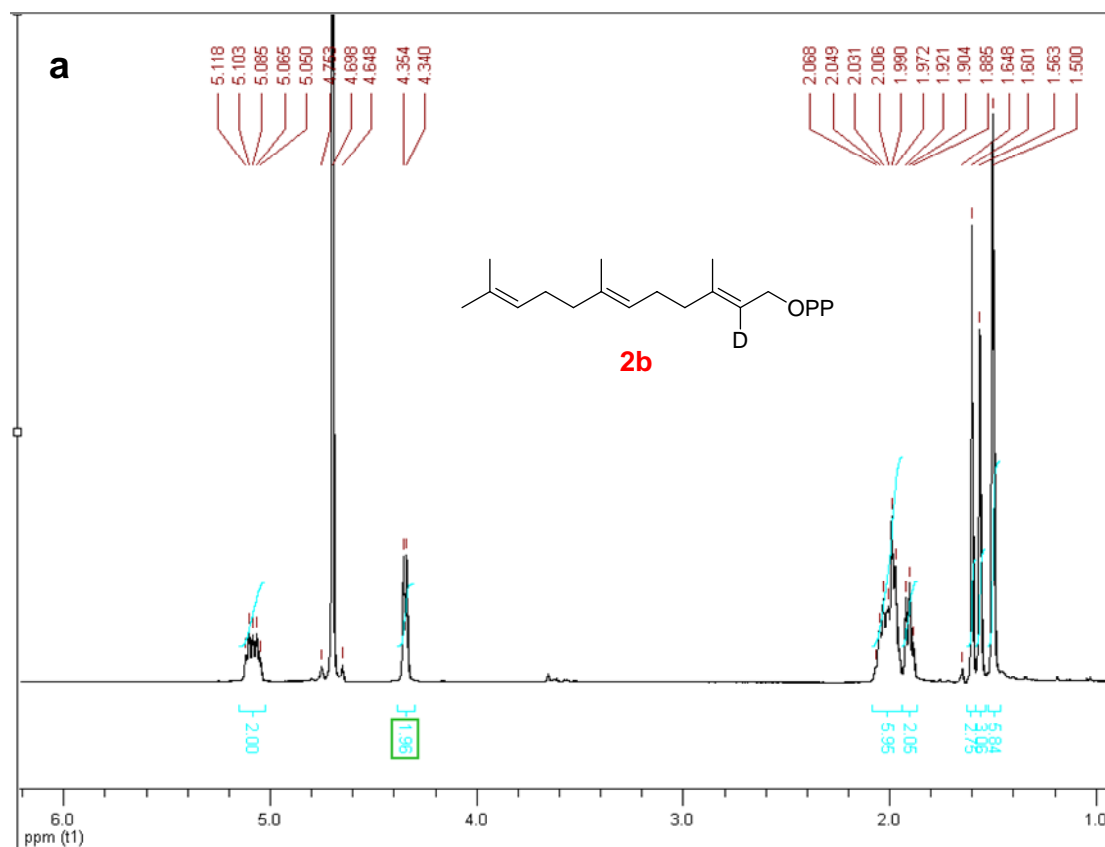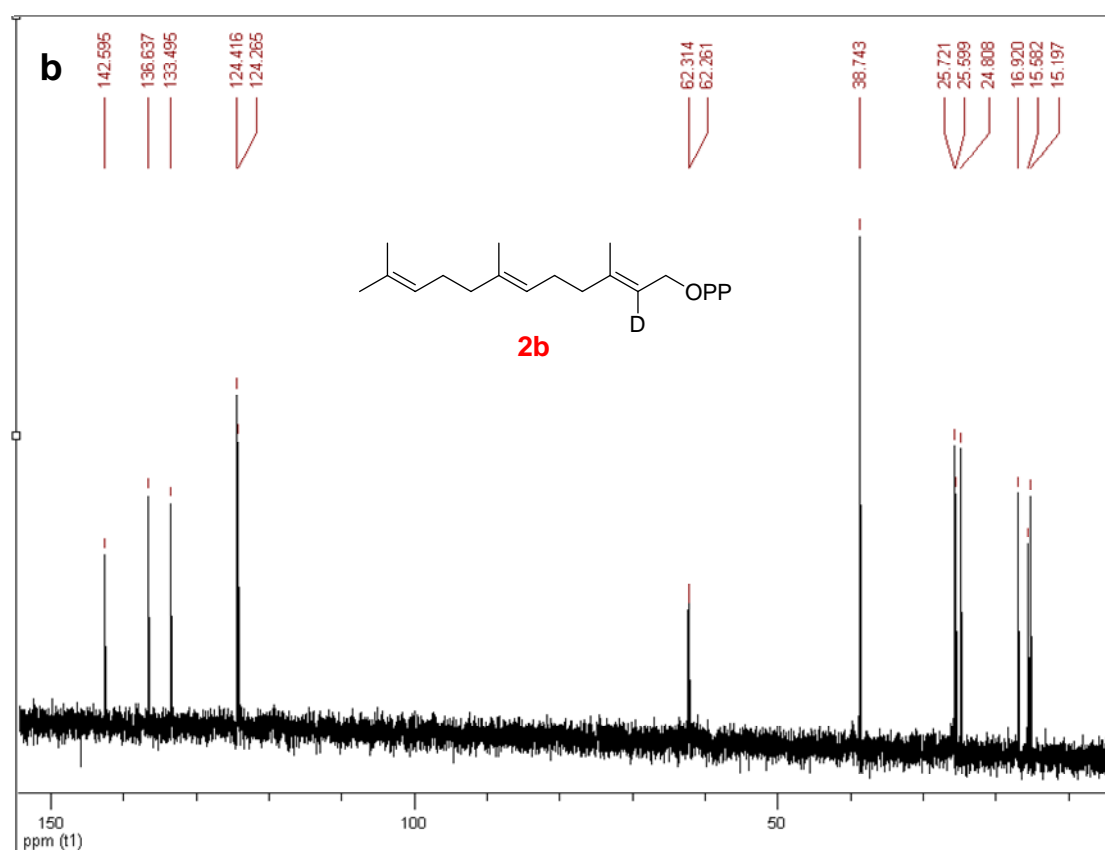

**Figure S7.** [2-<sup>2</sup>H]FPP (**2b**). a) <sup>1</sup>H NMR (400 MHz, D<sub>2</sub>O). b) <sup>13</sup>C NMR (100 MHz, D<sub>2</sub>O).

**Incubation of [2-<sup>2</sup>H]FPP with Germacradienol/Geosmin Synthase.** [2-<sup>2</sup>H]FPP (**2b**, 99 μM) was incubated with germacradienol/geosmin synthase (7.0 μM) in 5 mL of buffer (50 mM Tris-HCl, 20% glycerol, 3 mM MgCl<sub>2</sub>, pH 8.2) at 30 °C for 6 h 15 min with a pentane overlay. The reaction mixture was extracted with 3×3 mL of pentane/CH<sub>2</sub>Cl<sub>2</sub> (5:1) and analyzed by GC-MS (Figure S8).

Abundance

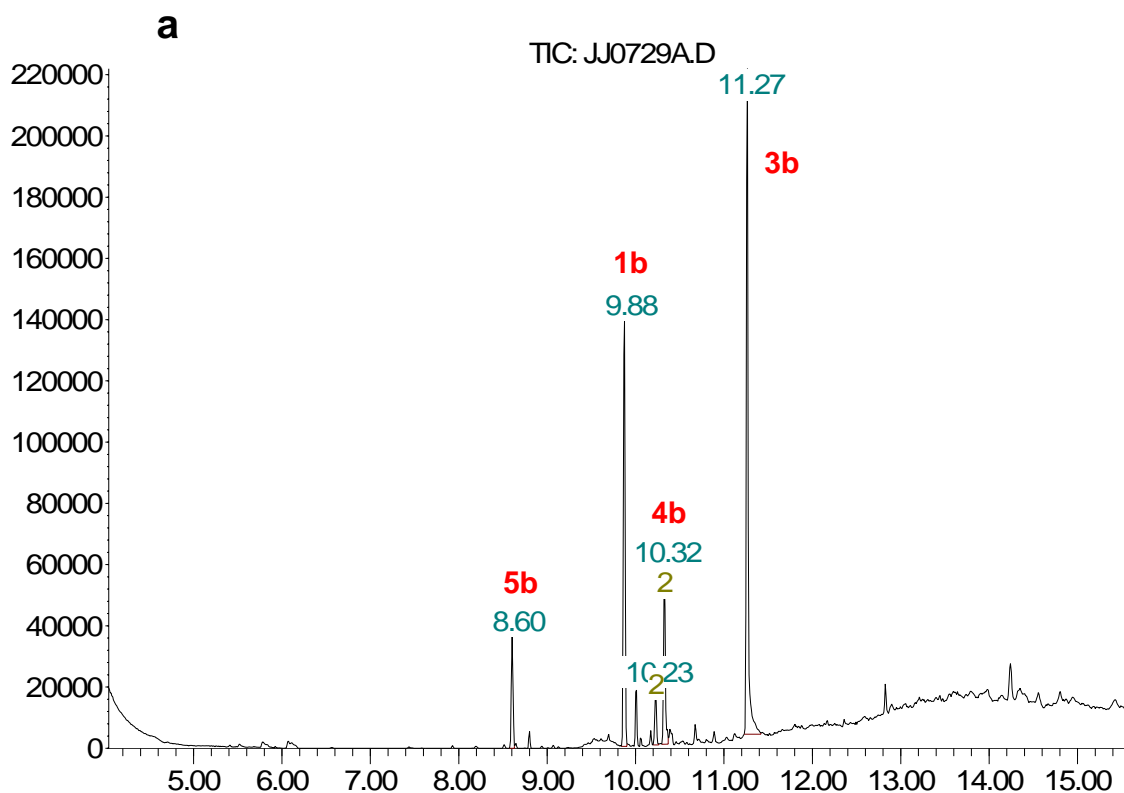

Time-->

Abundance

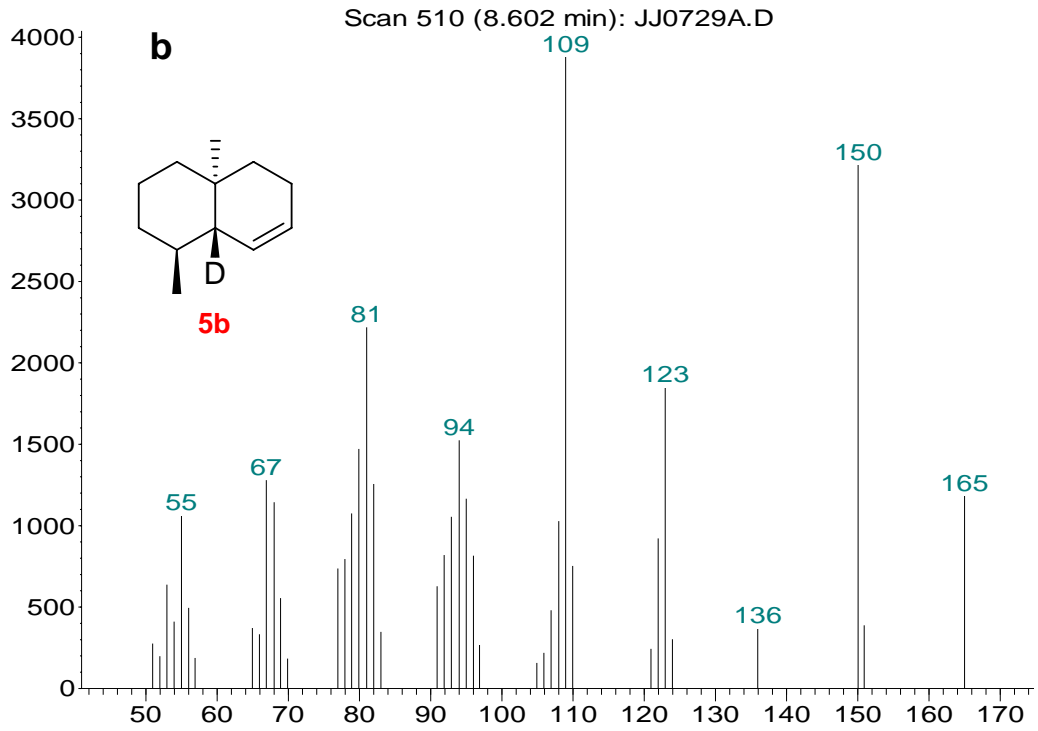

Abundance

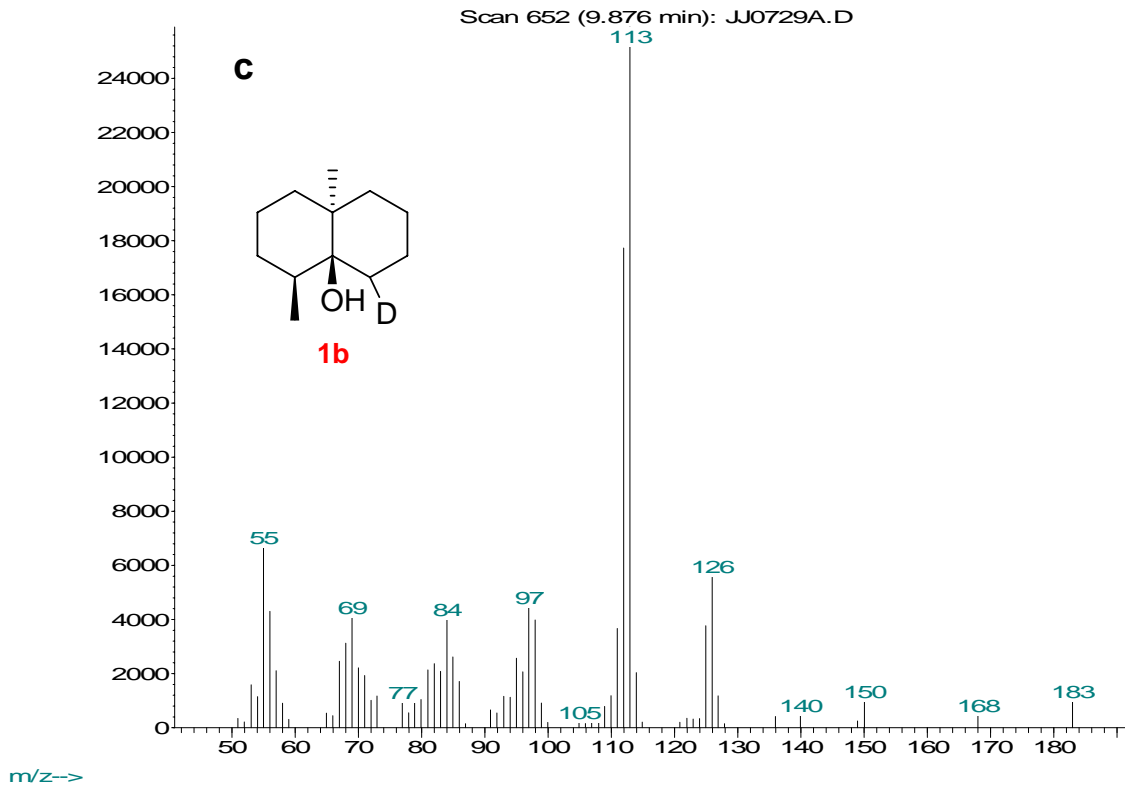

Abundance

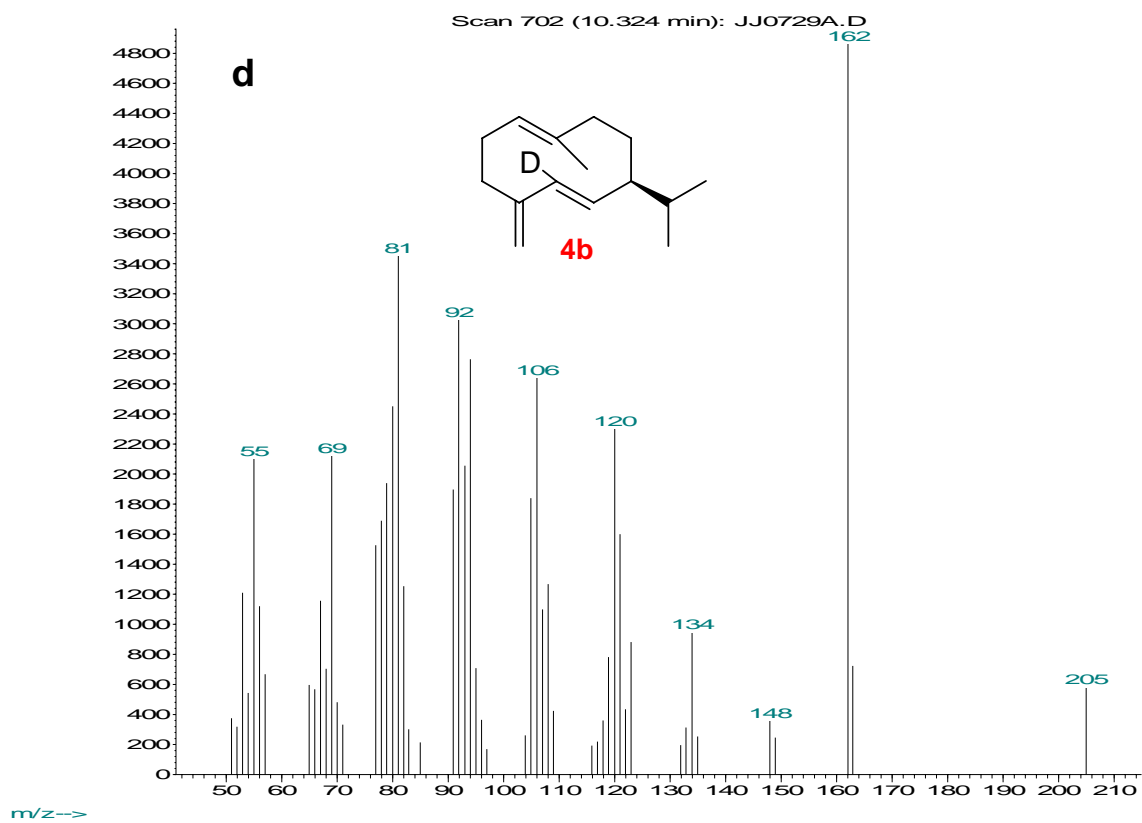

Abundance

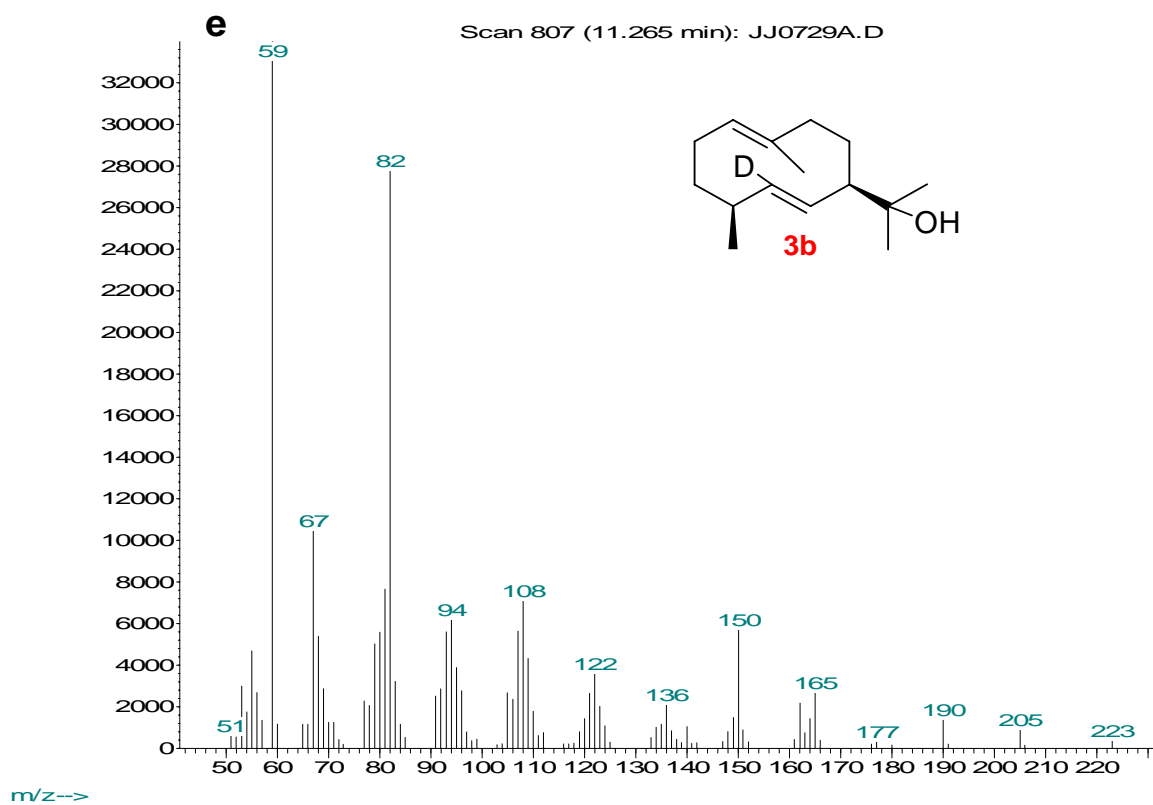

**Figure S8.** Incubation of 99  $\mu\text{M}$  [2- $^2\text{H}$ ]-FPP (**2b**) with 7.0  $\mu\text{M}$  germacradienol/geosmin synthase at 30 °C for 6 h 15 min. a) (A) GC-MS. b) MS of octalin (**5b**), ret. time 8.60 min. c) MS of [6- $^2\text{H}$ ]geosmin (**1b**), ret. time 9.88 min. d) MS of germacrene D (**4b**), ret. time 10.32 min. e) MS of germacradienol (**3b**), ret. time 11.27 min.

## References

- (1) Cane, D. E.; Watt, R. M. *Proc. Natl. Acad. Sci. USA* **2003**, *100*, 1547-1551.
- (2) Jiang, J.; He, X.; Cane, D. E. *J. Am. Chem. Soc.* **2006**, *128*, 8128-8129.
- (3) Arigoni, D.; Cane, D. E.; Shim, J. H.; Croteau, R.; Wagschal, K. *Phytochemistry* **1993**, *32*, 623-631.
- (4) Croteau, R.; Felton, N. M.; Wheeler, C. J. *J. Biol. Chem.* **1985**, *260*, 5956-5962.
